# Supplementary material for: The impact of feedback of intraoperative technical performance in surgery: a systematic review
Source: HighWire-hosted journal article supplement (doi:10.1136/bmjopen-2014-006759), 2015-06-01
Supplement: bmjopen-2014-006759supp1.pdf [file bmjopen-2014-006759supp1.pdf]

## **Appendix: Search strategy**

Databases:   **Ovid MEDLINE(R)** <1948 to February Week 5 2013>  
                  **Embase**                   <1980 to 2013 Week 06>  
                  **AMED**                    <1985 to February 2013>  
                  **PsycINFO**               <1987 to February Week 1 2013>

Search Strategy via **Ovid SP** Interface:

---

|    |                                               |        |
|----|-----------------------------------------------|--------|
| 1  | surgical skill\$.ti,ab,sh.                    | 3419   |
| 2  | surgical performance.ti,ab,sh.                | 947    |
| 3  | surgical training.ti,ab,sh.                   | 12533  |
| 4  | surgical education.ti,ab,sh.                  | 1627   |
| 5  | surgical competenc\$.ti,ab,sh.                | 362    |
| 6  | surgical proficiency.ti,ab,sh.                | 106    |
| 7  | surgical ability.ti,ab,sh.                    | 52     |
| 8  | surgical expertise.ti,ab,sh.                  | 795    |
| 9  | (surgeon\$ adj4 performance).ti,ab.           | 864    |
| 10 | (surgeon\$ adj4 experience\$).ti,ab.          | 16159  |
| 11 | (surgeon\$ adj4 assess\$).ti,ab.              | 3064   |
| 12 | (surgeon\$ adj4 skill\$).ti,ab.               | 2773   |
| 13 | (surgeon\$ adj4 individual).ti,ab.            | 1704   |
| 14 | (surgeon\$ adj4 learning).ti,ab.              | 1094   |
| 15 | exp Specialties, surgical/mt, st              | 21043  |
| 16 | exp Surgical procedures, operative/st         | 26882  |
| 17 | or/1-16                                       | 85503  |
| 18 | Feedback.ti,ab.                               | 130446 |
| 19 | Knowledge of results.ti,ab.                   | 2075   |
| 20 | Self-assessment.ti,ab.                        | 11951  |
| 21 | exp Employee Performance Appraisal/mt, st, sn | 1290   |
| 22 | exp Process Assessment/mt                     | 369    |
| 23 | or/18-22                                      | 145256 |
| 24 | 17 and 23                                     | 1514   |
| 25 | limit 24 to english language                  | 1451   |

---

Database:       **Cochrane Database of Systematic Reviews**       <2000 to 2012>

Search Strategy via **PubMed** Interface:

---

1       Cochrane Database Syst Rev[Journal] AND (Surgery OR Surgeon OR Surgical) AND (Training OR Performance OR Skill OR Skills OR Competence OR Competency OR Proficiency OR Ability OR Expertise OR Learning Curve) AND (Feedback OR Knowledge of Results (Psychology) OR Self-Assessment OR Education, Medical, Continuing/methods)
