# Supplementary material for: The impact of feedback of intraoperative technical performance in surgery: a systematic review
Source: HighWire-hosted journal article supplement (doi:10.1136/bmjopen-2014-006759), 2015-06-01
Supplement: bmjopen-2014-006759supp2.pdf [file bmjopen-2014-006759supp2.pdf]

## **Data extraction from reviewed studies**

### **Study design**

| <b>Author</b>      | <b>Year</b> | <b>Surgical procedure</b>          | <b>Prospective</b> | <b>Retrospective</b> | <b>Experimental</b> | <b>Observational</b> | <b>Cross-sectional</b> | <b>Longitudinal</b> | <b>Hospital setting</b> | <b>Study design</b> |
|--------------------|-------------|------------------------------------|--------------------|----------------------|---------------------|----------------------|------------------------|---------------------|-------------------------|---------------------|
| Boyle et al.       | 2011        | Simulated laparoscopic colectomy   | 1                  | 0                    | 1                   | 0                    | 1                      | 0                   | 1                       | RCT                 |
| Boyle et al.       | 2011        | Simulated renal artery angioplasty | 1                  | 0                    | 1                   | 0                    | 1                      | 0                   | 1                       | RCT (three arms)    |
| Grantcharov et. al | 2007        | Cholecystectomy                    | 1                  | 0                    | 1                   | 0                    | 1                      | 0                   | 1                       | RCT                 |

### Study participants

| Author             | Year | Surgical procedure                 | Country | Participating surgeons | No. of surgeons in arm 1 | No. of surgeons in arm 2 | No. of surgeons in arm 3 | Total number of surgeons | Procedures per surgeon |
|--------------------|------|------------------------------------|---------|------------------------|--------------------------|--------------------------|--------------------------|--------------------------|------------------------|
| Boyle et al.       | 2011 | Simulated laparoscopic colectomy   | Ireland | Surgical trainees      | 16                       | 12                       |                          | 28                       | 5                      |
| Boyle et al.       | 2011 | Simulated renal artery angioplasty | Ireland | Surgical trainees      | 6                        | 6                        | 6                        | 18                       | 6                      |
| Grantcharov et. al | 2007 | Cholecystectomy                    | Denmark | Surgical trainees      | 8                        | 8                        |                          | 16                       | 2                      |

**Feedback**

| <b>Author</b>      | <b>Year</b> | <b>Surgical procedure</b>          | <b>Feedback dissemination - written</b> | <b>Feedback dissemination - oral</b> | <b>Self-assessment</b> | <b>Video recording-assisted feedback dissemination</b> | <b>Peer benchmarking</b> | <b>Feedback provided with literature figures</b> | <b>Frequency: feedback after every procedure</b> |
|--------------------|-------------|------------------------------------|-----------------------------------------|--------------------------------------|------------------------|--------------------------------------------------------|--------------------------|--------------------------------------------------|--------------------------------------------------|
| Boyle et al.       | 2011        | Simulated laparoscopic colectomy   | 0                                       | 1                                    | 1                      | 0                                                      | 1                        | 0                                                | 1                                                |
| Boyle et al.       | 2011        | Simulated renal artery angioplasty | 0                                       | 1                                    | 0                      | 0                                                      | 0                        | 0                                                | 1                                                |
| Grantcharov et. al | 2007        | Cholecystectomy                    | 0                                       | 1                                    | 0                      | 1                                                      | 0                        | 0                                                | 1                                                |

**Outcomes and improvement**

| <b>Author</b>      | <b>Year</b> | <b>Surgical procedure</b>          | <b>Video recording-assisted assessment of outcomes</b> | <b>Measured outcome - procedure time</b> | <b>Measured outcome - instrument path length</b> | <b>Measured outcome - instrument smoothness</b> | <b>Measured outcome - economy of movement</b> | <b>Measured outcome - error scores</b> | <b>Measured outcome - learning curves</b> | <b>Measured outcome - procedure specific measures</b> | <b>Feedback improved at least outcome</b> |
|--------------------|-------------|------------------------------------|--------------------------------------------------------|------------------------------------------|--------------------------------------------------|-------------------------------------------------|-----------------------------------------------|----------------------------------------|-------------------------------------------|-------------------------------------------------------|-------------------------------------------|
| Boyle et al.       | 2011        | Simulated laparoscopic colectomy   | 0                                                      | 0                                        | 1                                                | 1                                               | 0                                             | 1                                      | 1                                         | 0                                                     | 1                                         |
| Boyle et al.       | 2011        | Simulated renal artery angioplasty | 1                                                      | 1                                        | 0                                                | 0                                               | 0                                             | 1                                      | 0                                         | 1                                                     | 1                                         |
| Grantcharov et. al | 2007        | Cholecystectomy                    | 1                                                      | 1                                        | 0                                                | 0                                               | 1                                             | 1                                      | 0                                         | 0                                                     | 1                                         |
